# Supplementary material for: Development of Double Hydrophilic Block Copolymer/Porphyrin Polyion Complex Micelles towards Photofunctional Nanoparticles
Source: MDPI journal article supplement (doi:10.3390/polym14235186), 2022-11-29
Supplement: s1 [file s1]

## Supporting Information for:

### Development of Double Hydrophilic Block Copolymer/Porphyrin Polyion Complex Micelles Towards Photofunctional Nanoparticles

Maria Karayianni, Dimitra Koufi and Stergios Pispas \*

*Theoretical and Physical Chemistry Institute, National Hellenic Research Foundation,  
48 Vassileos Constantinou Avenue, 116 35 Athens, Greece*

\* Correspondence: pispas@eie.gr

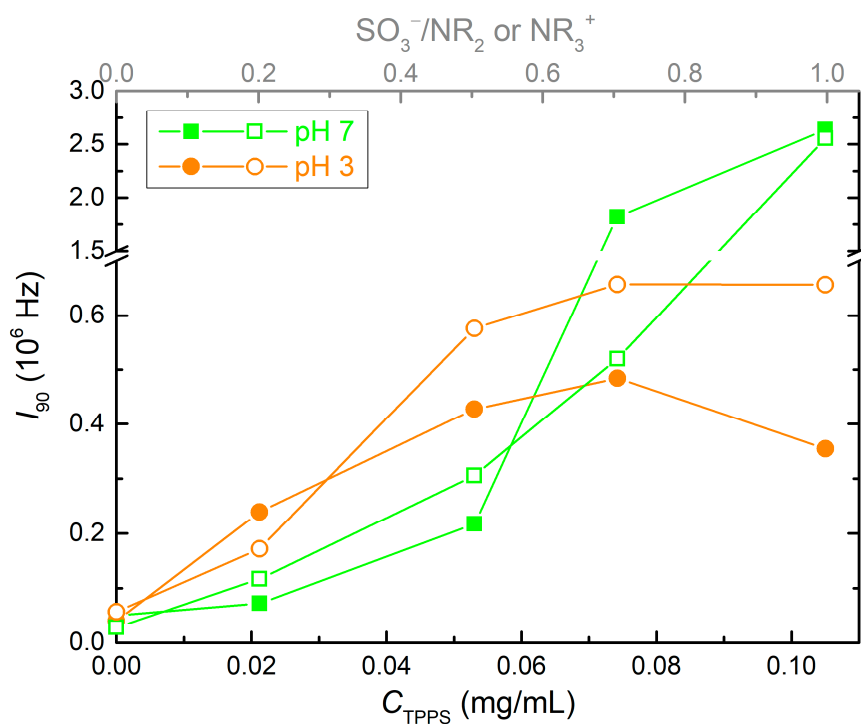

**Figure S1.** Comparison of DLS scattering intensity values at  $90^\circ$   $I_{90}$  for the DHBC/TPPS (closed symbols) and the QDHBC/TPPS (open symbols) complex solutions at pH 7 and 3, as a function of porphyrin concentration  $C_{TPPS}$  or charged groups ratio  $SO_3^-/NR_2$  or  $NR_3^+$  ( $R = CH_3$ ).

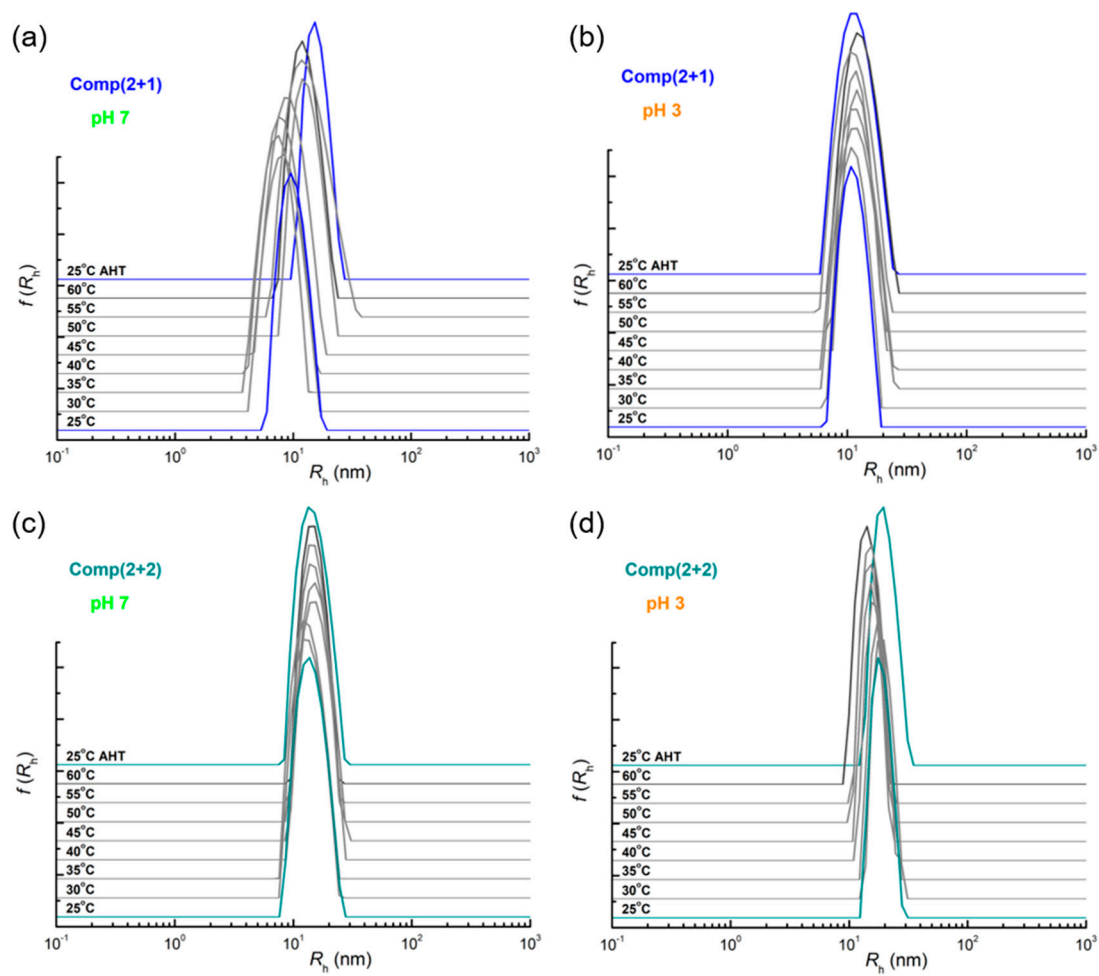

**Figure S2.** Size distribution functions (SDFs) derived from DLS measurement at 90° for the complex solutions (a, b) Comp(2+1) and (c, d) Comp(2+2) of the DHBC/TPPS system at pH 7 (left) and 3 (right) at different temperatures ranging from 25 to 60 °C (5 °C step), and cooled back to 25 °C after heat treatment (AHT).

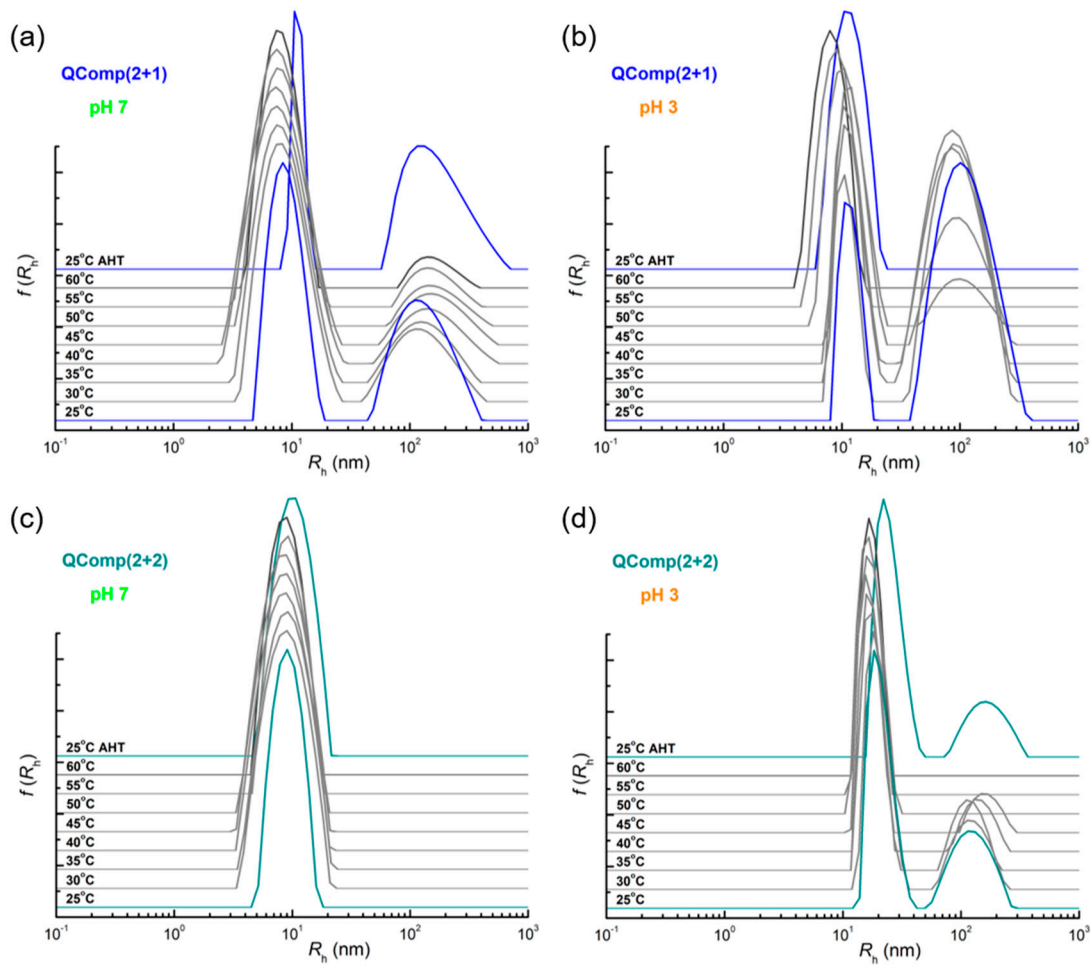

**Figure S3.** Size distribution functions (SDFs) derived from DLS measurement at 90° for the complex solutions (a, b) QComp(2+1) and (c, d) QComp(2+2) of the QDHBC/TPPS system at pH 7 (left) and 3 (right) at different temperatures ranging from 25 to 60 °C (5 °C step), and cooled back to 25 °C after heat treatment (AHT).

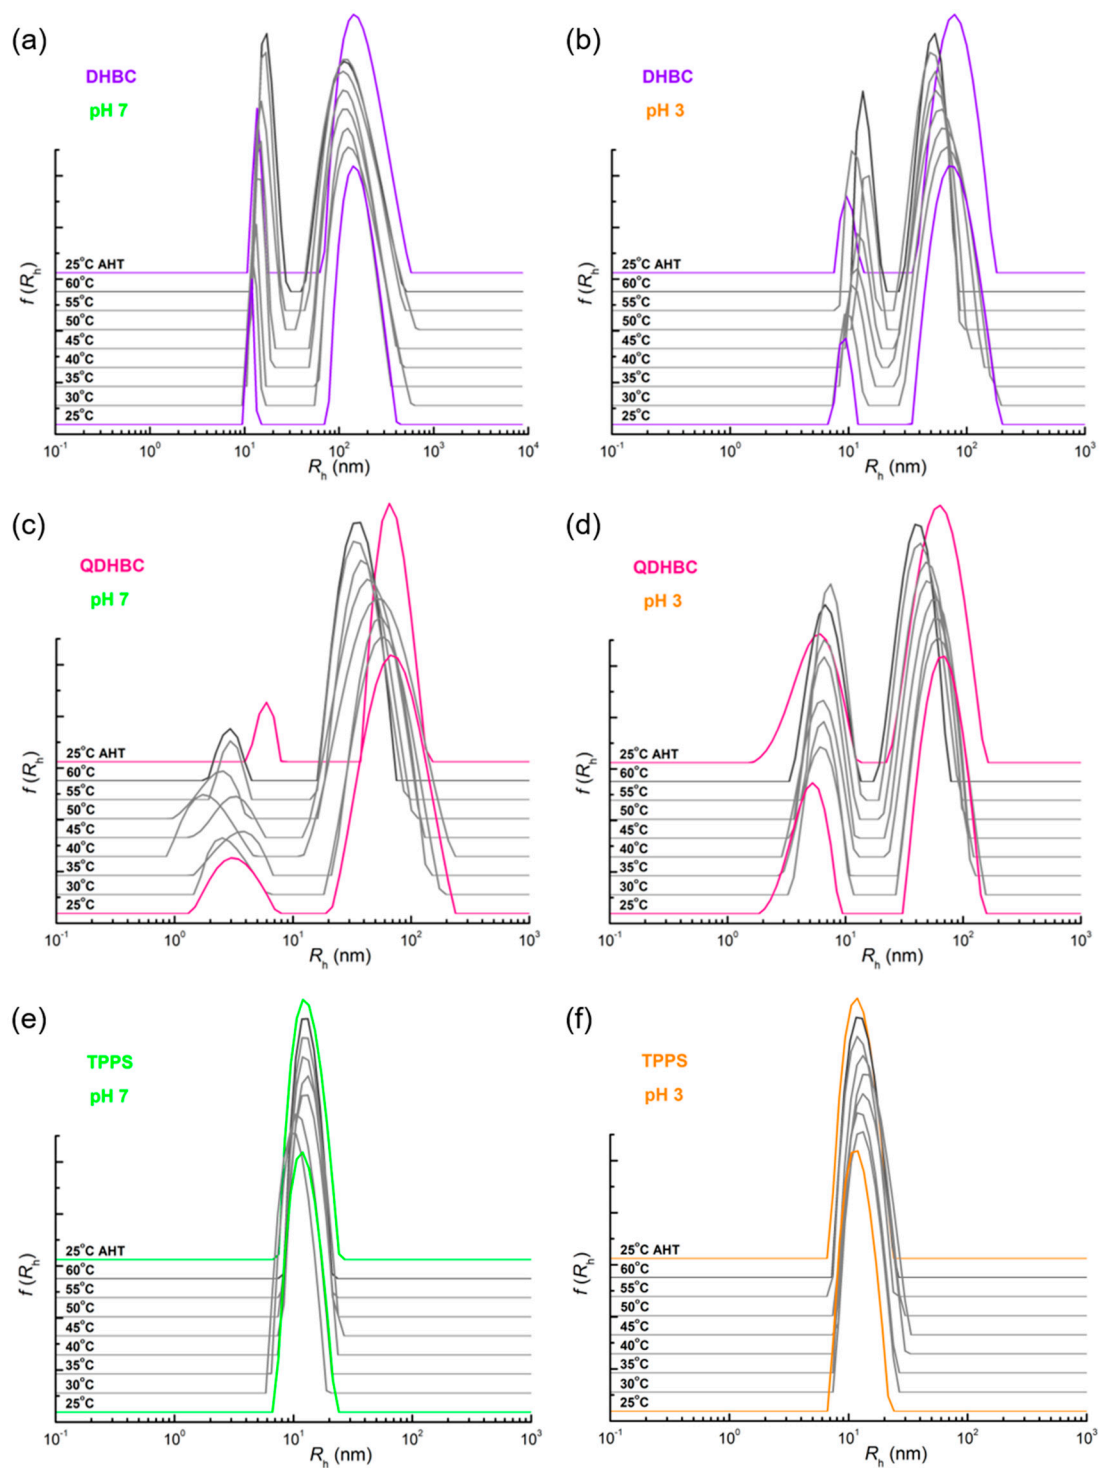

**Figure S4.** Size distribution functions (SDFs) derived from DLS measurement at 90° for the neat (a, b) DHBC, (c, d) QDHBC and (e, f) TPPS solutions at pH 7 (left) and 3 (right) at different temperatures ranging from 25 to 60 °C (5 °C step), and cooled back to 25 °C after heat treatment (AHT).
